# Supplementary material for: A previously overlooked, highly diverse early Pleistocene elasmobranch assemblage from southern Taiwan
Source: PeerJ. 2022 Oct 20;10:e14190. doi: 10.7717/peerj.14190 (PMC9588305; doi:10.7717/peerj.14190)
Supplement: Table S1 — Only teeth are included, i.e., spines, vertebrae and other remains are not included. Nomenclatures remain as those reported in the literature. [file peerj-10-14190-s002.xlsx]

## Sheet: Supplemental Table S1
Reference	Family	Taxa	n
Hooijer, 1954	Carchariidae	Carcharias cf. cuspidatus	7
	Lamnidae	Isurus cf. glaucus	1
	Hemigaleidae	Hemipristis cf. serra	11
	Carcharhinidae	Carcharhinus cf. brachyurus	5
	Carcharhinidae	Carcharhinus cf. gangeticus	>12
	Galeocerdonidae	Galeocerdo cuvier	2
	Total		38
Koumans, 1949	Lamnidae	Carcharodon cf. megalodon	1
	Lamnidae	Odontaspis cf. cuspidata	2
	Lamnidae	Isurus cf. hastatus var. trigonodon	4
	Carcharhinidae	Eulamia gangetica	15
	Total		22
Yudha et al., 2018	Odontaspididae	Carcharias	2
	Otodontidae	Parotodus	2
	Alopiidae	Alopias	11
	Lamnidae	Isurus	6
	Lamnidae	Carcharodon	3
	Hemigaleidae	Hemipristis	16
	Carcharhinidae	Carcharhinus	58
	Carcharhinidae	Negaprion	4
	Carcharhinidae	Scoliodon	1
	Carcharhinidae	Galeocerdo	2
	Sphyrnidae	Sphyrna	18
	Total		123
Karasawa, 1989	Lamnidae	Carcharodon carcharias	4
	Lamnidae	Isurus oxyrinchus	1
	Total		5
Kawase & Nishimatsu, 2016	Squatinidae	Squatina nebulosa	11
	Heterodontidae	Heterodontus japonicus	7
	Lamnidae	Carcharodon carcharias	1
	Triakidae	Hemitriakis japanica	2
	Carcharhinidae	Carcharhinus leucas	1
	Carcharhinidae	Carcharhinus longimanus	1
	Carcharhinidae	Carcharhinus plumbeus	4
	Carcharhinidae	Carcharhinus sp.	1
	Sphyrnidae	Sphyrna zygaena	2
	Rhynchobatidae	Rhynchobatus djiddensis	3
	Dasyatidae	Urogymnus asperrimus	1
	Dasyatidae	Dasyatis akajei	13
	Myliobatidae	Myliobatis tobijei	7
	Myliobatidae	Aetobatus narinari	2
	Total		56
Tanaka & Taru, 2022	Squalidae	Squalus sp.	1
	Pristiophoridae	Pristiophorus japonicus	18
	Squatinidae	Squatina sp.	10
	Lamnidae	Carcharodon carcharias	7
	Alopiidae	Alopias vulpinus	3
	Carcharhinidae	Rhizoprionodon acutus	5
	Carcharhinidae	Rhizoprionodon sp.	1
	Carcharhinidae	Carcharhinus sp.	14
	Sphyrnidae	Sphyrna zygaena	1
	Rajidae	Raja pulchra	1
	Rajidae	indet.	1
	Dasyatidae	Dasyatis sp.	5
	Myliobatidae	Myliobatis tobijei	14
	Myliobatidae	indet.	12
	Total		93
