# Supplementary material for: A previously overlooked, highly diverse early Pleistocene elasmobranch assemblage from southern Taiwan
Source: PeerJ. 2022 Oct 20;10:e14190. doi: 10.7717/peerj.14190 (PMC9588305; doi:10.7717/peerj.14190)
Supplement: Table S2 — * = estimated crown height values for specimens with slightly worn apex. [file peerj-10-14190-s003.xlsx]

## Sheet: Supplemental Table S2
Specimen	Crown height (mm)	Tooth position	Fish total length (m) (Shimada, 2003)		(Linear function)
ASIZF0100322	22.18	a1	3.22155
ASIZF0100323	23.19	l2	4.46472
ASIZF0100324	23.25	i1	3.98807
ASIZF0100325	28.24	a2	3.76336
ASIZF0100326	25.38*	i1	4.36329
ASIZF0100328	24.22*	a2	3.21676
ASIZF0100329	23.06	a2	3.05904
ASIZF0100332	9.63	l4	2.87307
ASIZF0100333	13.58	l4	4.26387
ASIZF0100335	18.88	L5	4.92295
ASIZF0100336	20.09	L4	3.60318
ASIZF0100337	32.98	A2	3.96997
ASIZF0100338	29.48	A2	3.54636
ASIZF0100339	20.27	L4	3.63497
ASIZF0100340	41.03	L2	5.56067
ASIZF0100341	22.07	L2	3.01377
ASIZF0100343	16.13	A2	1.93061
ASIZF0100344	23.51	L3	3.42535
ASIZF0100345	38.41	A1	4.47794
ASIZF0100435	6.76	L6	2.67471
ASIZF0100465	9.1	l3	1.97754
ASIZF0100530	34.08	A2	4.1031
CMM-F0001	35.59	A2	4.28586
CMM-F0002	19.88	L4	3.5661
CMM-F0004	33.38	A1	3.89838
CMM-F0005	20.39	L3	2.97139
CMM-F0007	28.13*	L1	4.04902
CMM-F0008	11.24	L5	2.90744
CMM-F0010	22.33	L3	3.25366
CMM-F0012	23.41	a2	3.10663
CMM-F0013	15.69*	a2	2.05694
CMM-F0014	13.23	I1	3.00243
CMM-F0015	15.93	L5	4.14471
CMM-F0016	16.19*	l2	3.12044
CMM-F0017	14.36*	l1	2.40433
CMM-F0018	17.86	L4	3.20941
CMM-F0019	18.91	L4	3.39482
CMM-F0020	21.86	L2	2.98556
CMM-F0022	17.12	l1	2.88559
CMM-F0210	8.74	l4	2.5597
CMM-F0212	10.43	L6	4.51723
CMM-F2824	33.36	A2	4.01596
CMM-F2825	33.04	a2	4.41602
CMM-F2830	33.47	L1	4.80714
